# Supplementary material for: Coastal impacts of Storm Gloria (January 2020) over the north-western Mediterranean
Source: Copernicus journal article supplement (doi:10.5194/nhess-20-1955-2020), 2020-07-14
Supplement: Supplementary file 1 [file nhess-20-1955-2020-supplement.pdf]

Supplement of Nat. Hazards Earth Syst. Sci., 20, 1955–1968, 2020  
<https://doi.org/10.5194/nhess-20-1955-2020-supplement>  
© Author(s) 2020. This work is distributed under  
the Creative Commons Attribution 4.0 License.

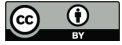

*Supplement of*

## **Coastal impacts of Storm Gloria (January 2020) over the north-western Mediterranean**

**Angel Amores et al.**

*Correspondence to:* Angel Amores ([angel.amores@uib.es](mailto:angel.amores@uib.es))

The copyright of individual parts of the supplement might differ from the CC BY 4.0 License.

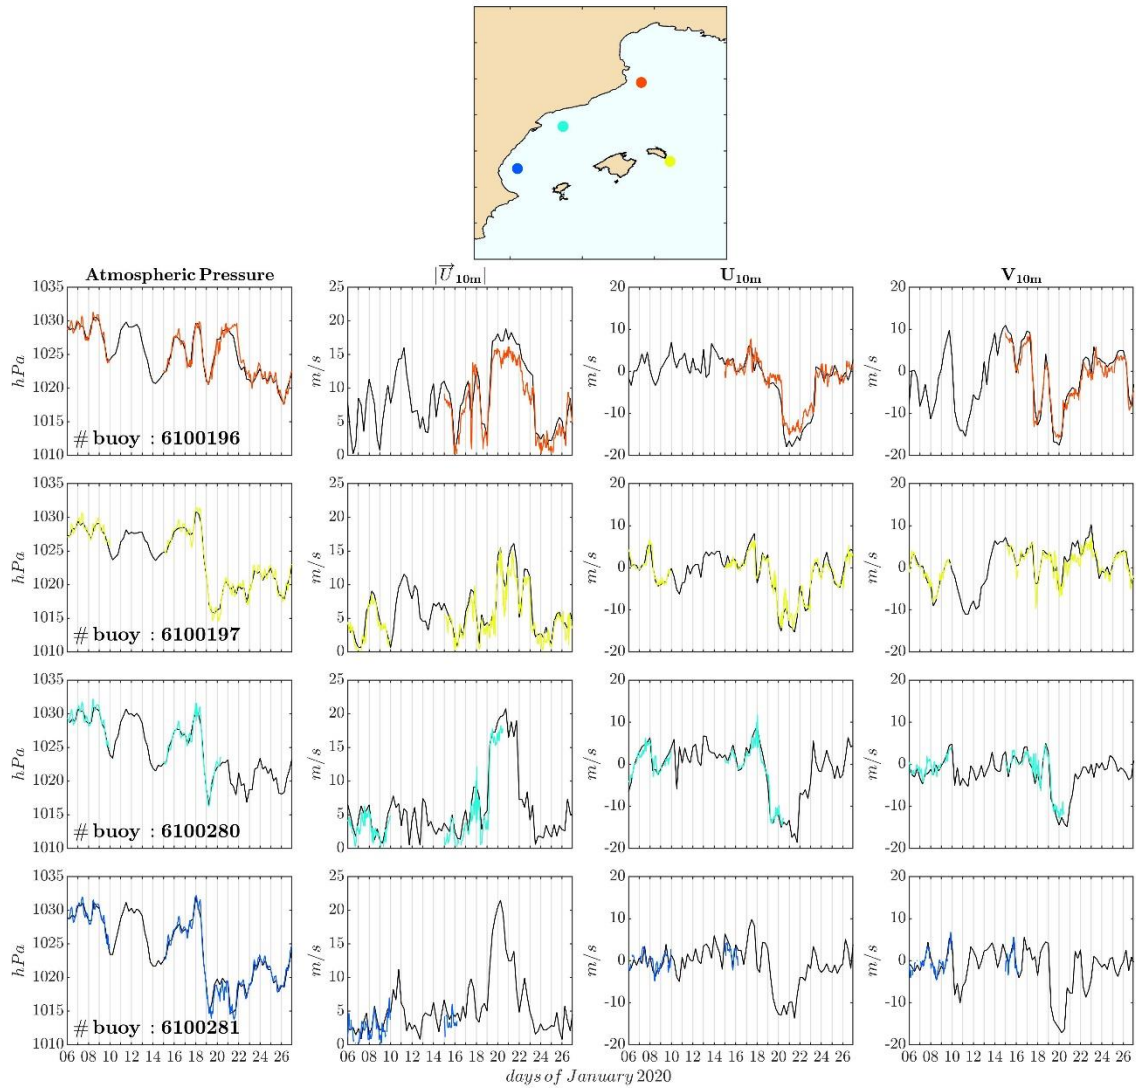

Figure S1: Comparison between modelled (black lines) and observed atmospheric pressure and wind fields (colours; each colour corresponds to one location in the map) at buoy locations.

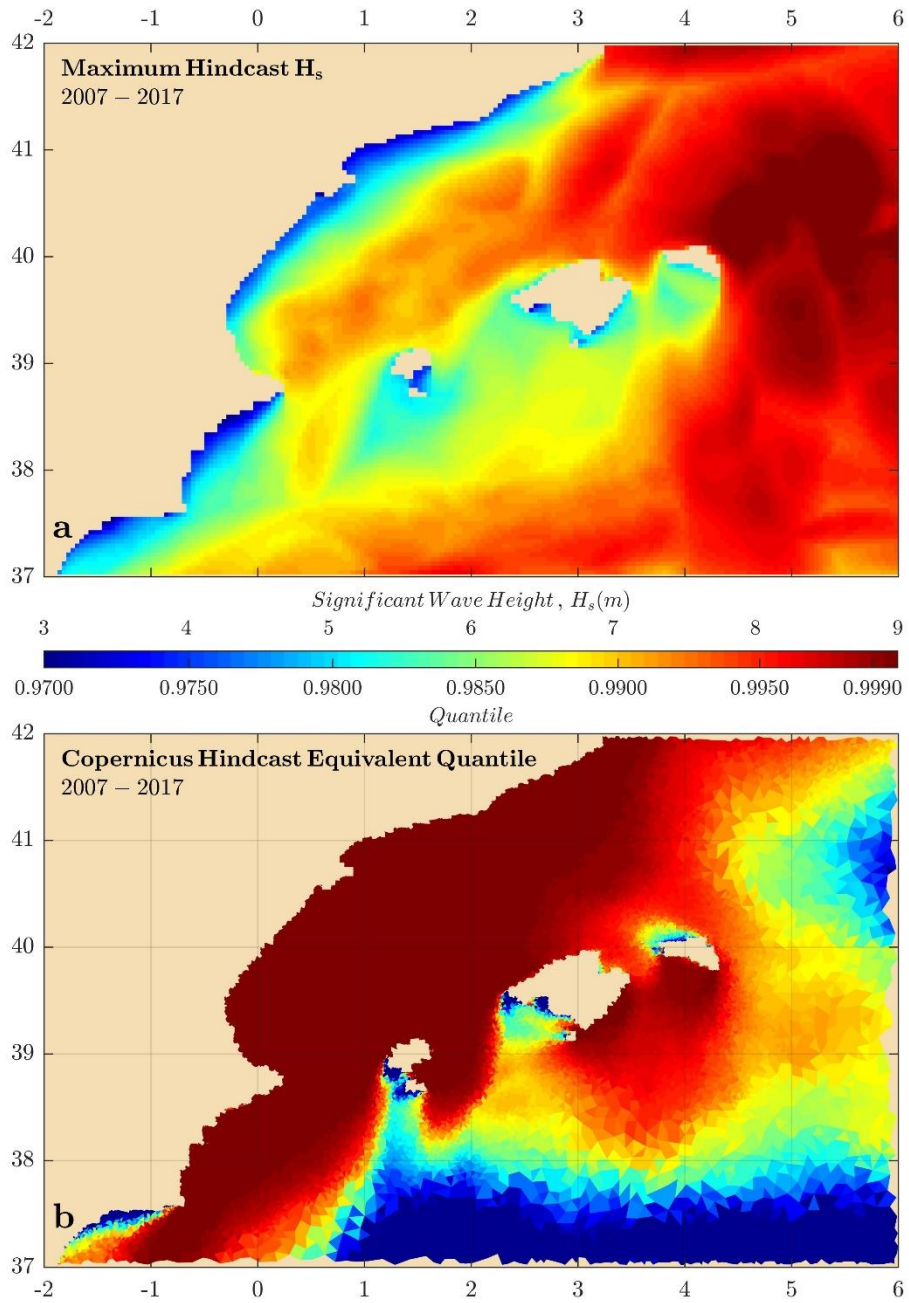

Figure S2: Maximum  $H_s$  in the Copernicus Hindcast (a) and its corresponding quantiles compared to our simulation of Gloria Storm.

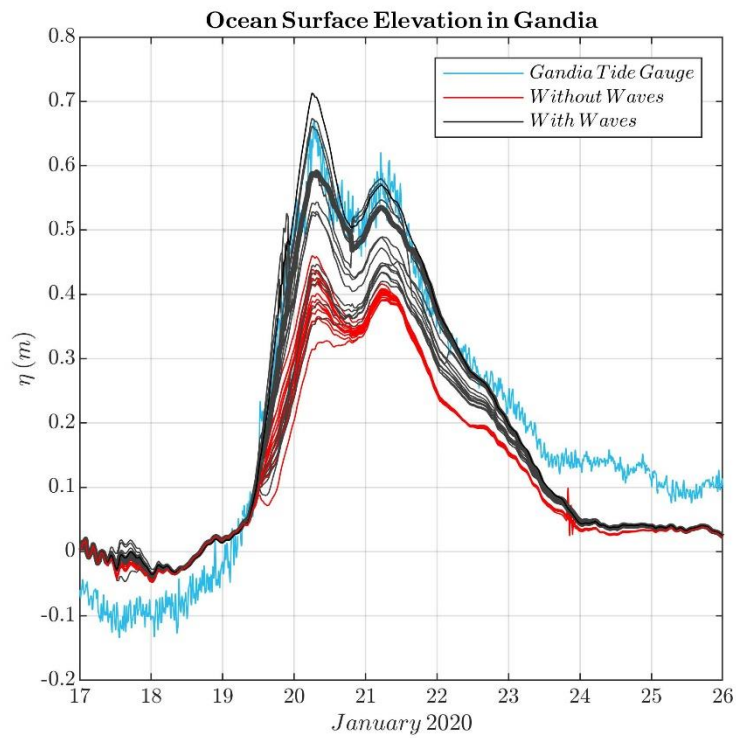

Figure S3: Comparison of the storm surges observed by the tide gauge of Gandia (light blue) to the coupled (black lines), and decoupled (red lines) simulations. To avoid strong bathymetric dependencies, the time series of all modelled points closer to 2.5 km to the tide gauge location are shown. The closest modelled point to the tide gauge is indicated by a thick black line.

**Video S1:** Animation of the simulated period. The first panel shows the atmospheric forcing (wind speed in colours and black arrows; surface atmospheric pressure in black isolines), the second the total simulated surge, and the third panel shows the wind waves.
